1 **Feedback inhibition of AMT1 NH<sub>4</sub><sup>+</sup>-transporters mediated by CIPK15 kinase**

2

3 **Hui-Yu Chen<sup>1</sup>, Yen-Ning Chen<sup>1</sup>, Hung-Yu Wang<sup>1</sup>, Zong-Ta Liu<sup>1</sup>, Wolf B. Frommer<sup>2,3</sup> & Cheng-Hsun**

4 **Ho<sup>1,\*</sup>**

5

6 **AFFILIATION:**

7 <sup>1</sup> Agricultural Biotechnology Research Center, Academia Sinica, Taipei, 115, Taiwan

8 <sup>2</sup> Institute for Molecular Physiology, Heinrich-Heine-University Düsseldorf

9 <sup>3</sup> Institute of Transformative Bio-Molecules (WPI-ITbM), Nagoya University, Chikusa, Nagoya 464-8601,

10 Japan ITbM

11

12 \*Correspondence should be addressed to C.-H. H. (email: [zcybele3@sinica.edu.tw](mailto:zcybele3@sinica.edu.tw); Tel:+886-2-2787-2123)

13 **SUMMARY**

14 Ammonium ( $\text{NH}_4^+$ ), a key nitrogen form, becomes toxic when it accumulates to high levels. Ammonium  
15 transporters (AMTs) are the key transporters responsible for  $\text{NH}_4^+$  uptake. AMT activity is under allosteric  
16 feedback control, mediated by phosphorylation of a threonine in the cytosolic C-terminus (CCT). However,  
17 the kinases responsible for the  $\text{NH}_4^+$ -triggered phosphorylation remain unknown. In this study, a functional  
18 screen identified protein kinase CBL-Interacting Protein Kinase15 (CIPK15) as a negative regulator of  
19 AMT1;1 activity. CIPK15 was able to interact with several AMT1 paralogs at the plasma membrane.  
20 Analysis of AmTryoshka, an  $\text{NH}_4^+$  transporter activity sensor for AMT1;3 in yeast, and a two-electrode-  
21 voltage-clamp (TEVC) of AMT1;1 in *Xenopus* oocytes showed that CIPK15 inhibits AMT activity. CIPK15  
22 transcript levels increased when seedlings were exposed to elevated  $\text{NH}_4^+$  levels. Notably, *cipk15* knockout  
23 mutants showed higher  $^{15}\text{NH}_4^+$  uptake and accumulated higher amounts of  $\text{NH}_4^+$  compared to the wild-type.  
24 Consistently, *cipk15* was hypersensitive to both  $\text{NH}_4^+$  and methylammonium but not nitrate ( $\text{NO}_3^-$ ). Taken  
25 together, our data indicate that feedback inhibition of AMT1 activity is mediated by the protein kinase  
26 CIPK15 via phosphorylation of residues in the CCT to reduce  $\text{NH}_4^+$ -accumulation.

27

28

29 **KEYWORDS**

30 *Arabidopsis thaliana*, ammonium, protein kinase, phosphorylation, transporter

31

32 **RUNNING TITLE**

33 CIPK15 inhibits  $\text{NH}_4^+$  uptake

## 34 INTRODUCTION

35 As a key building block of nucleic acids, amino acids, and proteins, nitrogen is an essential nutrient. In  
36 plants, nitrogen supply can limit or inhibit growth, development and crop yield when below or above the  
37 optimal range. Ammonium ( $\text{NH}_4^+$ ) is one of the main inorganic forms of nitrogen for plant nutrition.  $\text{NH}_4^+$   
38 is also an important nitrogen source for bacteria, fungi, and plants, but becomes toxic when it rises above  
39 certain levels [1-5].

40 Plants take up  $\text{NH}_4^+$  with the help of specific transporters. AMT/MEP/Rhesus protein superfamily members  
41 function as electrogenic high-affinity  $\text{NH}_4^+$  transporters [6-9]. Potassium ( $\text{K}^+$ ) channels can also mediate  
42  $\text{NH}_4^+$  uptake [10]. The *Arabidopsis* genome contains six AMT paralogs, four (AMT1;1, 1;2, 1;3, and 1;5)  
43 of which are together essential for  $\text{NH}_4^+$  uptake [11, 12]. Unlike  $\text{K}^+$  channels, AMTs are highly selective for  
44  $\text{NH}_4^+$  and its methylated form, methylammonium (MeA) [6, 13]. In addition to their roles as transporters,  
45 AMTs can also function as receptors involved in the control of root growth and development, similar to the  
46 yeast MEP2 transceptor, which measures  $\text{NH}_4^+$  concentrations to regulate pseudohyphal growth [14].  
47 Recently, a ratiometric biosensor of  $\text{NH}_4^+$  transporter activity, named AmTryoshka, which reports  $\text{NH}_4^+$   
48 transporter activity *in vivo*, was developed by inserting a cassette carrying two fluorophores into AMT1;3  
49 [15]. Most organisms, including animals, plants, and even bacteria are sensitive to high levels of  $\text{NH}_4^+$ . A  
50 sole supply of nitrogen as  $\text{NH}_4^+$  is typically noxious [16]. In bacteria, the existence of highly effective  
51 detoxification mechanisms may have prevented the discovery of  $\text{NH}_4^+$  toxicity. The actual mechanisms of  
52  $\text{NH}_4^+$  toxicity are not understood for any organism, but several hypotheses have been proposed: (i) pH  
53 effects-uptake and assimilation of  $\text{NH}_4^+$  lead to acidification of the cytosol; (ii) membrane depolarization-  
54  $\text{NH}_4^+$  uptake depolarizes the membrane, thus high levels of  $\text{NH}_4^+$  uptake could affect the capability of the  
55 cell to take up other nutrients; (iii) inhibition of electron flow in plastidic and mitochondrial membranes;  
56 (iv) increased production of reactive oxygen species that damage the cells [17, 18]; and (v) replacement of  
57 potassium as an enzyme cofactor, altering the catalytic properties and/or folding of enzymes that require  $\text{K}^+$   
58 [19, 20]. The increased  $\text{NH}_4^+$  toxicity at low  $\text{K}^+$  concentration strongly supports the  $\text{K}^+$  replacement

59 hypothesis [21]. Overaccumulation of ammonium can occur under various conditions, e.g., due to local  
60 placement of high doses by animals or by overfertilization. The concentrations of salts, and thus ammonium  
61 also rapidly increase during soil drying. To prevent accumulation of  $\text{NH}_4^+$  becoming toxic, the activity of  
62 AMTs is tightly regulated and likely based on feedback inhibition [22, 23]. Recent reports indicate that the  
63 phosphorylation of critical threonine (T460), which is triggered by  $\text{NH}_4^+$  in the cytosolic C-terminus (CCT)  
64 of AMT1;1 leads to transport inhibition via allosteric regulation in the trimeric transporter complex [24, 25].  
65 The AMT1;1 CCT, which serves as an allosteric switch, is highly conserved among the AMT homologs  
66 found in species ranging from bacteria to higher plants. Use of this allosteric regulation mechanism of  
67 AMT1;1 for feedback control allows plants to rapidly and efficiently block the uptake of  $\text{NH}_4^+$  before levels  
68 become toxic. Yet, the full circuitry leading to  $\text{NH}_4^+$ -dependent phosphorylation of AMTs is not fully  
69 understood. We speculate that specific kinases are activated under conditions that lead to  $\text{NH}_4^+$  accumulation.  
70 Members of the CBL-interacting protein kinases [CIPK, also named SNF1-related kinases (SnRK)], which  
71 typically function together with members of the Calcineurin B-like protein (CBL) family, are known to  
72 regulate the activities of diverse types of transporters including the plasma membrane  $\text{Na}^+/\text{H}^+$  exchanger  
73 SOS1 [26], the potassium channel AKT1 [27], magnesium transport [28], the nitrate transceptor CHL1 [29],  
74 the  $\text{H}^+/\text{ATPase}$  AHA2 [30] and several anion channels [31]. To examine whether CIPKs function as AMT  
75 regulators, we systematically screened for CIPKs able to affect AMT1;1 activity in *Xenopus* oocytes. In this  
76 study, we show that *Arabidopsis* CIPK15 acts as a negative regulator of AMT1;1 activity. CIPK15 directly  
77 interacted with AMT1;1 and inhibited AMT1;1 activity via phosphorylation of T460. This negative effect  
78 of CIPK15 on AMT1;1 activity was also observed by using an  $\text{NH}_4^+$  transporter activity sensor-  
79 AmTryoshka1;3 LS-F138I, a ratiometric genetically encoded biosensor in yeast [15]. *CIPK15* transcript  
80 levels increased in response to addition of external  $\text{NH}_4^+$ . Notably, compared to wild-type, *cipk15* mutants  
81 showed higher  $^{15}\text{NH}_4^+$  uptake and accumulated higher amounts of  $\text{NH}_4^+$  and were hypersensitive to both  
82  $\text{NH}_4^+$  and MeA. Together, our data indicate that in the presence of elevated  $\text{NH}_4^+$ , CIPK15 inhibits AMT1;1  
83 activity to prevent  $\text{NH}_4^+$  toxicity.

## 84 MATERIALS AND METHODS

85 **Plant materials and treatments.** Experiments were performed with *Arabidopsis thaliana* ecotype Col-0.  
86 The knockout lines of AMT-*qko*, the quadruple AMT which carry T-DNA insertions in *AMT1;1*, *1;2*, *1;3*,  
87 and *2;1*), *cbl4* (At5g24270, SALK\_113101), and *cipk19* (At5g45810, SALK\_044735) have been previously  
88 described [32-34]. Plant growth conditions have also been previously described [25], and were used here  
89 with minor modifications. Arabidopsis seeds were surface sterilized and germinated on half-strength  
90 modified Murashige Skoog medium (MS), nitrogen-free salts (Phytotechlab, M407) with 5 mM KNO<sub>3</sub> as  
91 the sole nitrogen source, 0.5% [w/v] sucrose, and 1% [w/v] agar, pH 5.8 [KOH] on vertical plates. For qRT-  
92 PCR, protein blots, NH<sub>4</sub><sup>+</sup> content, and N<sup>15</sup> labeled uptake assays, seedlings (7 days after germination) were  
93 transferred to the half-strength MS medium lacking nitrogen for 2 days, and then, seedlings were transferred  
94 to half-strength MS medium supplemented with NH<sub>4</sub>Cl, <sup>15</sup>NH<sub>4</sub>Cl or NO<sub>3</sub><sup>-</sup> according to the concentrations  
95 indicated in the respective figure legends. Roots were collected and frozen in liquid nitrogen. Seedlings  
96 were incubated in a 16/8 h light/dark period at 22°C. For NH<sub>4</sub><sup>+</sup> content, seedlings were collected after being  
97 starved for 2 days, or after treatment with 1 mM NH<sub>4</sub>Cl, and 1 mM KNO<sub>3</sub> for 1 h. For N<sup>15</sup> labeled uptake  
98 assays, seedlings were collected after being starved for 2 days (1 mM <sup>15</sup>NH<sub>4</sub>Cl was used for the last 15 mins  
99 for <sup>15</sup>N-labeling), or after treatment with 1mM NH<sub>4</sub>Cl, and 1mM KNO<sub>3</sub> for 1 h (1mM <sup>15</sup>NH<sub>4</sub>Cl was used for  
100 the last 15 mins for N<sup>15</sup>-labeling). <sup>15</sup>N-labeled seedlings were then dried for 2-3 days at 65°C and further  
101 analyzed by Thermo Finnigan Delta plus XP IRMS (ThermoFisher Scientific). For primary root length  
102 determination, seedlings (3 days after germination) were transferred to half-strength MS medium with  
103 nitrogen-free salts, containing KNO<sub>3</sub>, NH<sub>4</sub>Cl or methylammonium (MeA) as nitrogen sources at the  
104 concentrations indicated in the figures, and grown for another one to five days. Seedlings were scanned on  
105 a flatbed scanner, and primary root length was measured using NIH ImageJ software ([imagej.nih.gov](http://imagej.nih.gov)).

106 **Characterization of T-DNA insertion mutants.** Col-0, *CIPK15* (*SnRK3.1*) (At5g01810) T-DNA insertion  
107 lines *cipk15-1* (SALK\_203150) and *cipk15-2* (GK604B06) were obtained from the Arabidopsis Biological  
108 Resource Center (<http://www.arabidopsis.org/abrc/>). T-DNA insertions in *CIPK15* were confirmed by PCR

109 analysis and sequencing using the T-DNA left border primer (5'-TGGTTCACATAGTGGGCCATCA) and  
110 CIPK15 F (5'-TCTTCTGGTGGTAGGACACG) and R (5'-TGGAATTCCAATGTGTCACC) primers.  
111 *H3GI* (At4g40040) was used as the loading control. *H3GI*, forward primer: 5'-  
112 AACCACTGGAGGAGTCAAGA-3'; reverse primer: 5'-CAATTAAGCACGTTCTCCTCT-3').

113 **Real-Time qRT-PCR analyses.** Real-time qRT-PCR was performed as previously described [29]. In brief,  
114 template cDNA samples were prepared using 4 µg of total RNA and the Improm-II reverse transcription  
115 system (Promega). Primers were designed to have a  $T_m$  of ~60°C and to produce PCR products of ~200–400  
116 base pairs. Expression levels in each experiment were first normalized to the expression of *Ubiquitin10*  
117 measured in the same cDNA samples (*AMT1;1*, forward primer: 5'-ACGACATTATCAGTCGC; reverse  
118 primer: 5'-CTGTCCTGTGTAGATTAACG; *CIPK15*, forward primer: 5'-GGCTACGCATCTGACT;  
119 reverse primer: 5'-CGTGCAAGCGACTATC; *CIPK23*, forward primer: 5'  
120 TCTTCTGGTGGTAGGACACG; reverse primer: 5'-TGGAATTCCAATGTGTCACC, and  
121 *Ubiquitin10*, forward primer: 5'-CTTCGTCAAGACTTTGACCG; reverse primer: 5'-  
122 CTTCTTAAGCATAACAGAGACGAG).

123 **Quantification of ammonium levels in plants.**  $\text{NH}_4^+$  content was determined colorimetrically at 410 nm  
124 after reaction with Nessler's reagent [35]. In brief, 500 mg of fresh matter was added to 1 ml of deionized  
125 water and shaken for 1 h at 45°C. Samples were centrifuged at 15,000g for 20 min. Ammonium content was  
126 determined on 50 µl of the supernatant using 1 ml of Nessler's reagent (Merck) and quantified by using a  
127 standard curve and expressed as µmol g<sup>-1</sup> FW.

128 **Split-ubiquitin yeast two-hybrid assays.** The split-ubiquitin yeast two-hybrid assay was as described  
129 previously [36]. In brief, ORFs of interest were cloned in frame with either the C-terminal (Cub) of TMBV4  
130 vector or N-terminal (NubG; wild-type I-13 replaced by G) domain of ubiquitin in pDL2Nx vector, and then  
131 introduced into yeast strains AP4 and AP5 by the lithium acetate method [37]. For interaction growth assays,  
132 yeast was transformed with plasmids containing AMT1s-Cub, CIPK15-Nub, CIPK19-Nub, NubI, or NubG.  
133 Colonies were picked and cells were serially diluted four-fold and grown for 2 days in either SD-Trp Leu

134 (control) or SD-Trp Leu His (for interaction).  $\beta$ -galactosidase ( $\beta$ -gal) activity was determined using filter  
135 assays, X-gal staining, and quantitative  $\beta$ -gal assays [38]. For filter assays, cells were streaked on filter  
136 paper, briefly frozen in liquid nitrogen, defrosted, and placed in Petri dishes filled with 0.5% agarose  
137 containing 35 mM  $\beta$ -mercaptoethanol (v/v) and 1.5 mg/mL of 5-bromo-4-chloro-3-indolyl- $\beta$ -D-galactoside  
138 (Sigma). For X-gal staining, yeast co-expressing bait and prey fusions were streaked onto minimal medium  
139 lacking leucine and tryptophan and onto media plates supplemented with X-gal. For quantitative  $\beta$ -gal  
140 assays, cells were grown in minimal medium lacking leucine and tryptophan at 30°C overnight to OD<sub>600</sub> of  
141 ~0.75, centrifuged, and washed in 1 ml Buffer Z (113 mM Na<sub>2</sub>HPO<sub>4</sub>, 40 mM NaH<sub>2</sub>PO<sub>4</sub>, 10 mM KCl, and  
142 1 mM MgSO<sub>4</sub>). To perform the assay, 300  $\mu$ l Buffer Z was added to the pellets and vortexed before lysing  
143 cells by 3 freeze-thaw cycles. Lysate (100  $\mu$ l) was added immediately to 700  $\mu$ l Buffer Z containing 0.27%  
144  $\beta$ -mercaptoethanol before addition of 160  $\mu$ l of 4 mg/ml 2-nitrophenyl-beta-D-galactopyranoside (ONPG)  
145 in buffer Z. The lysate was incubated at 30°C for 180 min. Reactions were stopped by adding 0.4 ml of  
146 0.1 M Na<sub>2</sub>CO<sub>3</sub>. Samples were centrifuged, and OD<sub>420</sub> of the supernatant was measured. For each prey-bait  
147 combination, five independent colonies were taken and the results were averaged.

148 **Split-fluorescent protein interaction assays in tobacco leaves.** Potential AMT1;1 and CIPK interactions  
149 were tested in a tobacco transient expression system using a modified split-fluorescent protein assay as  
150 previously described [39]. In brief, AMT1;1 and CIPKs were PCR amplified, cloned into the Gateway entry  
151 vector pENTR/D/TOPO, and then recombined into the Gateway binary destination vectors pXNGW,  
152 pNXGW, pCXGW, and pXCGW using LR clonase (Invitrogen). Each protein was independently tagged  
153 with cCFP and nYFP at either the N or C terminus. The binary vector backbone was derived from pPZP312,  
154 which contains a single 35S cauliflower mosaic virus promoter and terminator derived from pRT100. The  
155 binary constructs were further introduced into *A. tumefaciens* strain GV3101. Cell density was adjusted with  
156 infiltration buffer to OD<sub>600</sub> ~0.5. Agrobacteria harboring the Tomato Bushy Stunt Virus P19 silencing  
157 suppressor were co-infiltrated to reduce gene silencing. Aliquots (0.5 ml) of Agrobacterium cells carrying  
158 a split-fluorescent protein fusion construct and P19 constructs were mixed. A syringe was used to infiltrate

159 the mixture into the abaxial side of *N. benthamiana* leaves. Plants were incubated in a growth chamber at  
160 22°C, with a 16-/8-h day/night cycle for 36 to 48 h. Reconstitution of yellow fluorescent protein (YFP)  
161 fluorescence, chlorophyll, and bright field images in the transformed *N. benthamiana* leaves were recorded  
162 using confocal fluorescence microscopy (LSM780; Carl Zeiss).

163 **Extraction of membrane fractions and protein gel blot analyses.** For membrane preparation, roots or  
164 oocytes were ground in liquid nitrogen and resuspended in buffer containing 250 mM Tris-Cl, pH 8.5, 290  
165 mM sucrose, 25 mM EDTA, 5 mM  $\beta$ -mercaptoethanol, 2 mM DTT, 1 mM phenylmethylsulfonyl fluoride  
166 (PMSF), 0.53 mM Complete Protease Inhibitor Cocktail (Sigma-Aldrich), and 0.53 mM PhosStop  
167 Phosphatase Inhibitor Cocktail (Roche Applied Science). After centrifugation at 10,000g for 15 min,  
168 supernatants were filtered through Miracloth (Calbiochem) and recentrifuged at 100,000g for 45 min. The  
169 sediment containing the microsomes was resuspended in storage buffer [400 mM mannitol, 10% glycerol,  
170 6 mM MES/Tris, pH 8, 4 mM DTT, 2 mM PMSF, and 13 mM phosphatase inhibitor cocktails 1 and 2  
171 (Sigma-Aldrich)]. Proteins were denatured in loading buffer (62.5 mM Tris-HCl, pH 6.8, 10% [v/v] glycerol,  
172 2% [w/v] SDS, 0.01% [w/v] bromophenol blue, and 1% PMSF), incubated at 37°C for 30 min with or  
173 without 2.5% [v/v]  $\beta$ -mercaptoethanol at 0°C, and then electrophoresed in 10% SDS polyacrylamide gels  
174 (Invitrogen) and transferred to polyvinylidene fluoride membranes. Proteins were detected using the anti-  
175 AMT1;1 antibody or the anti-P-AMT1;1T460 antibody [25]. Blots were developed using an ECL Advance  
176 Western Blotting Detection Kit (Amersham). Protein and phosphorylation levels were measured using  
177 ImageJ software.

178 **Two-electrode voltage clamp of AMT1;1 in *Xenopus* oocytes.** Two-electrode voltage clamp (TEVC)  
179 measurements were performed in *Xenopus* oocytes as previously described [40]. In brief, ORFs of AMT1;1,  
180 CBL1, the constitutively active CIPK19-CA (Thr186 to Asp), and the 10 CIPKs (CIPK2, 3, 8, 9, 10, 15, 20,  
181 23, 24, 26 and CBL1, 4, kind gift from Jörg Kudla, Münster, Germany) in two pools of 5 in Gateway  
182 pDONR221 donor vector were further cloned into pOO2-GW via LR reactions of basic of Gateway Cloning  
183 Protocols [\(<https://www.thermofisher.com/tw/en/home/life-science/cloning/gateway->](https://www.thermofisher.com/tw/en/home/life-science/cloning/gateway-)



184 [cloning/protocols.html](#)) using LR Clonase II enzyme (Invitrogen). For *in vitro* transcription, pOO2GW  
185 plasmids were linearized with *Mlu*I or another suitable restriction enzyme. Capped cRNA was *in vitro*  
186 transcribed by SP6 RNA polymerase using mMMESSAGE mMACHINE kits (Ambion, Austin, TX). *Xenopus*  
187 *laevis* oocytes were obtained from Ecocyte Bio Science (Austin, TX). Oocytes were injected with distilled  
188 water (50 nl as control) or cRNA from AMT1;1, CIPKs, CBL1, CBL4, or CIPK19-CA (0.5 ng to 50 ng of  
189 cRNA as indicated in figure legends in 50 nl) using a robotic injector (Multi Channel Systems, Reutlingen,  
190 Germany) [41, 42]. Cells were kept at 16°C for 2-4 days in ND96 buffer containing 96 mM NaCl, 2 mM  
191 KCl, 1.8 mM CaCl<sub>2</sub>, 1 mM MgCl<sub>2</sub>, 5 mM HEPES, pH 7.4, and gentamycin (50 µg/µl). Electrophysiological  
192 analyses were typically performed 2-3 days after cRNA injection as previously described [40]. Typical  
193 resting potentials were about -40 mV. For current (I)-voltage (V) curves, measurements were recorded from  
194 oocytes that were first clamped at -40 mV followed by a step protocol to determine voltage dependence  
195 (-20 to -200 mV for 300 ms; in -20 mV increments). The current-voltage relationships were measured by  
196 the TEVC Roboocyte system (Multi Channel Systems) [41, 43].

197 **Fluorimetric analyses of AmTryoshka LS-F138I with CIPKs in yeast.** Fluorimetric analyses were  
198 performed in yeast as previously described [15]. In brief, CIPK15, CIPK19, and CIPK15m (K41N, an  
199 inactive form) were introduced into yeast expressing AmTryoshka1;3 LS-F138I. Vector only was used as  
200 the control. Cells were analyzed in 96-well, flat-bottom plates (Greiner Bio-One, Germany). Steady-state  
201 fluorescence was recorded using a fluorescence microplate reader (Infinite, M1000 pro, Tecan, Switzerland)  
202 in bottom-reading mode using 7.5 nm bandwidth and a gain of 100. The fluorescence emission spectra  
203 ( $\lambda_{exc}$  440 or 485 nm;  $\lambda_{em}$  510 or 570 nm) were background subtracted using yeast cells expressing a non-  
204 fluorescent vector control.

## 205 RESULTS

### 206 CIPK15 can block the activity of AMT1;1 and 1;3

207 To identify members of the CIPK family that can modulate AMT1;1 activity, two sets of mixtures of five  
208 CIPKs grouped according to their phylogenetic relationships [44] were co-expressed with AMT1;1 in  
209 *Xenopus* oocytes and AMT1;1 activity was recorded by two-electrode voltage clamping (TEVC) of *Xenopus*  
210 oocytes (Fig. S1). NH<sub>4</sub><sup>+</sup>-induced inward currents were completely blocked by a mixture of CIPK2, 10, 15,  
211 20 and 26, while the combination of CIPK3, 8, 9, 23 and 24 had no major impact on AMT1;1 activity (Fig.  
212 S1). The mixture of CIPK cRNAs was deconvoluted by testing individual CIPKs. During the first round of  
213 deconvolution, oocytes co-injected with equal amounts of *AMT1;1* and *CIPK15* cRNA showed strong  
214 inhibition of NH<sub>4</sub><sup>+</sup>-induced inward currents of AMT1;1 (Fig. 1a-b). We therefore focused on CIPK15. Full  
215 inhibition of detectable AMT1;1-mediated NH<sub>4</sub><sup>+</sup>-induced inward currents was also obtained when tenfold  
216 lower amounts of *CIPK15* cRNA (0.5 ng) were co-injected with *AMT1;1* (5 ng), a reduction of inward  
217 currents to below the detection level (Fig. 1c). Even at low *CIPK15* cRNA levels, CBL1 did not lead to  
218 detectable activation of AMT1;1 activity (Fig. S2). The inhibition of AMT1;1 activity was not due to effects  
219 of CIPK15 co-expression on AMT1;1 levels as shown by protein gel blots (Fig. S3). Because we focused  
220 on CIPK15, we cannot exclude the possibility that other CIPKs may also affect AMT activity, in particular  
221 when co-expressed with CBLs. A ratiometric fluorescence biosensor for AMT1 activity, named  
222 AmTryoshka, which reports NH<sub>4</sub><sup>+</sup> transporter activity *in vivo* was previously engineered by inserting a  
223 cassette carrying two fluorophores into AMT1;3 [15]. AmTryoshka1;3 LS-F138I sensor shows a reduction  
224 in the 510 to 570 nm emission ratio when it is challenged with NH<sub>4</sub><sup>+</sup>. Since the phosphorylation site T460  
225 in AMT1;1 is conserved in AMTs (Fig. S4), we tested whether CIPK15 affects AMT1;3 activity by  
226 measuring the response of the ratiometric AMT activity sensor AmTryoshka1;3 LS-F138I in yeast (Fig. 2).  
227 Addition of NH<sub>4</sub><sup>+</sup> to yeast cells expressing the sensor led to a reduction in the relative 510 to 570 nm  
228 emission ratio. CIPK15, but not its kinase inactive form (CIPK15m) blocked NH<sub>4</sub><sup>+</sup>-induced AmTryoshka  
229 LS-F138I responses (Fig. 2). Unlike CIPK15, CIPK19, which shares 52% identity with CIPK15, did not

230 impair  $\text{NH}_4^+$ -triggered AmTryishka1;3 LS-F138I response in yeast (Fig. S5). These data show that CIPK15  
231 can exert its effect in different heterologous systems and can specifically inhibit both AMT1;1 and AMT1;3.

### 232 $\text{NH}_4^+$ -induced *CIPK15* mRNA accumulation

233 In a screen of different heterologous systems for proteins that can affect AMT activity we identified CIPK15  
234 from Arabidopsis as a negative regulator. We therefore tested whether *CIPK15* may be regulated at the  
235 transcriptional level or regulate the AMT activity by  $\text{NH}_4^+$ . To test whether CIPK15 may be linked to  $\text{NH}_4^+$   
236 nutrition, the expression of CIPK15 in wild-type root in response to addition of 1 mM  $\text{NH}_4^+$  was examined.  
237 Similar to *AMT1;1*, *CIPK15* mRNA levels increased by about 10-fold less than one hour after adding  $\text{NH}_4^+$   
238 (Fig. 3). These data indicate *CIPK15* is  $\text{NH}_4^+$  inducible and plays roles in response to  $\text{NH}_4^+$  nutrition.

### 239 CIPK15 can interact with different AMTs

240 To test whether CIPK15 can interact with AMT1 isoforms, yeast split-ubiquitin interaction growth and  $\beta$ -  
241 galactosidase staining and filter assays were used [36]. AMTs (including 1;1, 1;2, 1;3, and 1;5) were fused  
242 to Cub (N-terminal ubiquitin domain fused to the artificial protease A-LexA-VP16 (PLV) transcription  
243 factor) and CIPK15 to NubG (N-terminal ubiquitin domain Ile-13 (NubI, positive control)) replaced by Gly;  
244 reduced affinity for Cub). Plasmids expressing AMTs, CIPK15, and controls (NubI and G) were expressed  
245 in yeast. Qualitative and quantitative assays (yeast interaction growth and  $\beta$ -galactosidase assays)  
246 demonstrated that CIPK15, but not CIPK19, can interact with AMT1;1 and several different AMTs (Figs.  
247 4a-c, Fig S6, control for Fig 4a, and Fig. S7). The specificity of CIPK15-AMT1;1 interaction was further  
248 supported by split-fluorescent protein interaction assays in which different combinations of reconstitution  
249 of YFP fluorescence from AMT1;1 and CIPK15 or CIPK19 were used in *N. benthamiana* leaves (Fig. 4d  
250 and Fig. S8). Together, the protein interaction results *in vitro* and *in vivo* indicate that CIPK15 can interact  
251 specifically with several members of the AMT1 family.

### 252 CIPK15 is necessary for $\text{NH}_4^+$ -triggered phosphorylation of T460 in AMT1

253 AMTs contain multiple possible phosphorylation sites [45]. T460 in the conserved CCT, which immediately  
254 follows transmembrane spanning domain XI, plays a key role in the allosteric regulation of AMT1;1 [24].  
255 To test whether CIPK15 is necessary for  $\text{NH}_4^+$ -triggered phosphorylation of T460, we identified two *cipk15*  
256 *knockout* mutants and analyzed the AMT1:1 phosphorylation status (Fig. S9a-b). Growth of the mutants on  
257 MS media and in soil did not indicate any obvious phenotypic differences compared with the wild-type (Fig.  
258 S9c). Phospho-specific antibodies were used to test for CIPK15-mediated  $\text{NH}_4^+$ -triggered phosphorylation  
259 of T460 using protein gel blots. The *knockout* line AMT-*qko* (quadruple amt mutant) combines T-DNA  
260 insertions in *AMT1;1*, *1;2*, *1;3*, and *2;1*, was used as a negative control [32]. After 7 days growth on MS  
261 media (high  $\text{NH}_4^+$ ), AMT1;1 protein levels were not different in the *cipk15* mutants and wild-type; however,  
262 the phosphorylation levels of AMT1 in the wild-type and *cipk15* mutants were low (Fig. S10). In the wild-  
263 type, phosphorylation of AMT1 increased substantially within 1 hour of exposure of N-starved plants to  
264  $\text{NH}_4^+$ ; AMT1 phosphorylation was undetectable in the *cipk15* mutants (Fig. 5). We therefore conclude that  
265 *CIPK15* is necessary for  $\text{NH}_4^+$ -triggered phosphorylation of AMT1.

#### 266 ***cipk15* mutant shows high $^{15}\text{NH}_4^+$ uptake activity and $\text{NH}_4^+$ accumulation**

267 If CIPK15 is a key regulator that is necessary for T460 phosphorylation, one would predict that *cipk15*  
268 mutants should accumulate more  $\text{NH}_4^+$  and show elevated sensitivity to  $\text{NH}_4^+$ . To determine whether  
269 CIPK15 may be able to affect ammonium uptake and  $\text{NH}_4^+$  toxicity in plants, *cipk15* mutants were exposed  
270 to  $\text{NH}_4^+$ . Both *cipk15* mutants were hypersensitive to  $\text{NH}_4^+$  but not  $\text{NO}_3^-$ . After  $\text{NH}_4^+$  pretreatment, *cipk15*  
271 mutant seedlings accumulated higher amounts of  $\text{NH}_4^+$  compared to the wild-type (Fig. 6a). Direct analysis  
272 of  $^{15}\text{NH}_4^+$  uptake showed that *cipk15* mutants imported more  $\text{NH}_4^+$  relative to the wild-type (Fig. 6b).  
273 Together, our data showed that CIPK15 is necessary for  $\text{NH}_4^+$ -triggered inhibition of AMT1-mediated  
274  $\text{NH}_4^+$ -uptake.

#### 275 **CIPK15 is a key factor for $\text{NH}_4^+$ tolerance in *Arabidopsis***

276 High levels of  $\text{NH}_4^+$  negatively impact primary root growth [46-48]. To test whether high accumulation of  
277  $\text{NH}_4^+$  in *cipk15* mutant and  $\text{NH}_4^+$ -induced phosphorylation of AMT1;1 by CIPK15 affects  $\text{NH}_4^+$  sensitivity,

278 root growth was analyzed in the presence or absence of  $\text{NH}_4^+$ . Primary root length was not significantly  
279 different in the wild-type and *qko* mutants in media containing nitrate as the sole nitrogen source (Fig. S11).  
280 By contrast, primary root length of wild-type was dramatically reduced in media containing  $\text{NH}_4\text{Cl}$  or MeA  
281 (Fig. 7 and Fig. S11). Notably, *cipk15* mutants were hypersensitive to  $\text{NH}_4^+$ , but not nitrate, as evidenced  
282 by shorter primary root length compared with wild-type and *qko* mutant plants (Fig. 7a and Fig. S12).  
283 Ammonium can be taken up via AMTs or  $\text{K}^+$  channels. By contrast, the  $\text{NH}_4^+$  analog methylammonium  
284 (MeA) is transported specifically via AMTs. *cipk15* mutants were also hypersensitive to MeA, further  
285 supporting the hypothesis that CIPK15 is necessary for limiting AMT1;1 activity and that the effects  
286 observed for  $\text{NH}_4^+$  can be related directly to the AMTs that contain the conserved domain including T460  
287 (Fig. 7b). CIPK15 has been found to be involved in other processes or interactions with CBL1/4; however,  
288 there was no effect on AMT1;1 activity in *Xenopus* oocytes when co-expressed with CBL1 or a  
289 constitutively active form of CIPK19 with CIPK15 (Fig. S2), and no effect on primary root length in *cbl4*  
290 and *cipk19* mutants when they were exposed to 20 mM  $\text{NH}_4\text{Cl}$  and  $\text{KNO}_3$  (Fig. S13) indicating that the  
291 effects observed with respect to ammonium toxicity are specific. Taken together, we conclude that CIPK15  
292 activity is necessary for limiting  $\text{NH}_4^+$  uptake by AMT1;1 when roots are exposed to  $\text{NH}_4^+$  or MeA.

293

294 **DISCUSSION**

295 Here, we identified the protein kinase CIPK15 as a key component in the  $\text{NH}_4^+$ -induced downregulation of  
296 ammonium uptake in Arabidopsis. CIPK15-mediated allosteric regulation of AMT1 activity may explain  
297 the observation that under field conditions,  $\text{NH}_4^+$ -uptake activity is negatively correlated with the external  
298 concentration of  $\text{NH}_4^+$  concentrations in the soil [49].

299 **Ammonium toxicity**

300 Most plants are sensitive to high levels of  $\text{NH}_4^+$  and supply with  $\text{NH}_4^+$  alone typically causes symptoms of  
301 growth retardation [16]. Animals and fungi are sensitive to  $\text{NH}_4^+$  as well, and recent work demonstrates that  
302 bacteria are also sensitive to  $\text{NH}_4^+$ . It is thus not surprising that ammonium uptake is under strict control and  
303 that the uptake rate is negatively correlated with the history of ammonium exposure [22]. Key questions are  
304 how toxic levels can be prevented, how the regulatory networks operate that limit ammonium accumulation  
305 and how and where the cells sense ammonium, intracellularly or at the cell surface. The extreme  
306 conservation of the CCT in AMTs across kingdoms, even in cyanobacteria and archaeobacteria as well as the  
307 dominant nature of mutations in the yeast homolog MEP1 piqued our interest and led to studies of the role  
308 of the CCT in AMT regulation [24, 50]. Genetic, biochemical and structural analyses have demonstrated  
309 that AMTs are triple-barreled transporters that are allosterically regulated. Regulation is mediated by the  
310 CCT, which interacts with the respective neighboring subunits for transactivation [24]. A conserved residue,  
311 T460 in AMT1;1, T472 in AMT1;2, and T464 in AMT1;3 is phosphorylated in response to addition of  $\text{NH}_4^+$   
312 [51, 52]. We therefore hypothesized that either a receptor-like kinase or a cytosolic kinase is required for  
313 the feedback inhibition.

314 **CIPK15 is necessary and sufficient for feedback inhibition**

315 CIPKs are known to be involved in the regulation of the activity of diverse sets of transporters including  
316 AKT1, SOS1, NPF6.3, IRT1, etc., we therefore hypothesized that specific members of the CIPK family  
317 might be able to phosphorylate AMT1;1. To accelerate the screen, we co-expressed sets of five CIPK genes

318 together with AMT1;1 and monitored AMT activity using TEVC. Based on our functional interaction screen  
319 assays, we identified and deconvoluted one of the mixtures that led to reduced AMT1;1 activity. CIPK15  
320 by itself was sufficient to substantially inhibit AMT1;1 activity. The inhibition effect on AMT1;1 activity  
321 was still obtained when lower amounts of *CIPK15* cRNA were co-injected with *AMT1;1* in oocytes, and  
322 CBL1 did not cause the activation of AMT1;1 activity in oocyte. We cannot exclude the possibility that  
323 some AMT1;1 activity remains even in the inhibited state in the oocyte system, but the activity was below  
324 the detection limit. Commercial oocytes are often lower quality compared to oocytes isolated freshly from  
325 locally held frogs, thus it is conceivable that experiments in which higher AMT activity can be detected  
326 CIPK15 may also reveal remaining AMT1 activity. However, our data demonstrate that, when co-expressed  
327 with AMT1;1 in oocytes, CIPK15 inhibits AMT1;1 activity. Moreover, upon functional interaction assay in  
328 yeast, CIPK15 also inhibited NH<sub>4</sub><sup>+</sup>-induced fluorescence change in the transport activity biosensor  
329 AmTryoshka1;3, indicating that CIPK15 can affect the activity of multiple AMT paralogs. The effect of  
330 CIPK15 on the AMTs is likely direct and specific, since CIPK15, but not CIPK19 can interact with AMT1;1  
331 or multiple AMTs and tune AMT activities. Importantly, mutant analyses demonstrate that CIPK15 is also  
332 necessary for NH<sub>4</sub><sup>+</sup>-triggered AMT1;1 phosphorylation (T460). *cipk15* mutants took up and accumulated  
333 more NH<sub>4</sub><sup>+</sup>, and were hypersensitive to NH<sub>4</sub><sup>+</sup> and the analog MeA. The MeA sensitivity of *cipk15* mutants  
334 intimate that the effects observed with respect to ammonium toxicity are due to inhibition of AMT activity,  
335 since MeA is transported by AMTs but not by potassium channels. Since CIPK15 is a factor produced in  
336 the cytosol, the action of the kinase is intracellular. This work, therefore, identifies the key kinase for AMT  
337 regulation, which represents a major step forward for the elucidation of the full regulatory circuit. AMT1;2  
338 also plays an important role in NH<sub>4</sub><sup>+</sup> uptake. Data from other groups may indicate that in oocytes AMT1;2  
339 mediates larger ammonium-induced inward currents when compared to AMT1;1 [53]. It remains open,  
340 whether the larger currents are due to different quality of oocytes from in house versus commercial facilities.  
341 The next experiments will need to address where and how NH<sub>4</sub><sup>+</sup> is sensed. CIPK15 and the AMTs may be  
342 useful tools to unravel the remaining steps in the regulatory circuitry.

### 343 **The relative role of CIPK15 and CIPK23 in AMT regulation**

344 Recent work has indicated that another CIPK, namely CIPK23 plays a role in the regulation of AMT1;1 and  
345 AMT1;2 [53]. The authors showed that CIPK23 can interact with AMT1;1 and AMT1;2 but did not observe  
346 an interaction with AMT1;3. Here, we identified an interaction between CIPK15 and AMT1;1 by using  
347 split-ubiquitin yeast two-hybrid assays in yeast, split-fluorescent protein interaction assays in *N.*  
348 *benthamiana* leaves, and functional interaction by TEVC in *Xenopus* oocytes. Interactions of CIPK15 with  
349 AMT1;2 and AMT1;3 were also identified by using split-ubiquitin yeast two-hybrid in yeast, and a  
350 functional interaction of CIPK15 with AMT1;3 was validated with the help of a ratiometric NH<sub>4</sub><sup>+</sup> transporter  
351 activity reporters in yeast. Consistent with the conservation of the domain surrounding the phosphorylation  
352 site (T460 in AMT1;1), the protein interaction and functional assay results indicate that CIPK15 likely  
353 affects activity of all three AMT1 paralogs. According to public transcriptome databases (e.g. TAIR,  
354 Genevestigator), *CIPK23* and *CIPK15* appear to be expressed in AMT1;1-expressing tissues. Here, we also  
355 found that *CIPK15* and *CIPK23* mRNA increased in response to NH<sub>4</sub><sup>+</sup> addition (Fig. S14). Notably, *CIPK15*  
356 mRNA accumulation triggered by 1mM NH<sub>4</sub><sup>+</sup> was about three and half-fold higher relative to the *CIPK23*  
357 mRNA accumulation, absolute levels of *CIPK15* are similar after ammonium addition compared to *CIPK23*.  
358 Consistent with the interaction, coexpression of CIPK23 in the presence of CBL1 led to about a two-fold  
359 lower current for AMT1;2 in *Xenopus* oocytes, while CIPK15 led to essentially complete loss of detectable  
360 AMT1;1-mediated currents. The data from the two labs are not directly comparable, since Straub et al.  
361 observed larger currents when analyzing the effect of CIPK23 on AMT1;2. AMT1;3 activity was also  
362 impaired by CIPK15 as shown using AmTryoshka1;3. While the experiments were not performed side by  
363 side, these data may indicate that CIPK23 plays a different and less prominent role as compared to CIPK15.  
364 In *cipk23* mutants, AMT1;1-GFP phosphorylation was reduced by ~20% for AMT1;1 and ~40% for  
365 AMT1;2. In comparison, *cipk15* mutants completely lost detectable AMT phosphorylation. In *cipk23*  
366 mutants, the shoot dry weight was reduced, and they showed higher <sup>15</sup>NH<sub>4</sub><sup>+</sup> uptake in the presence of  
367 ammonium relative to the wild-type. However, *cipk23* mutants displayed no difference regarding hypocotyl



368 length when exposed to 20 mM  $^{15}\text{NH}_4^+$ . Well characterized CIPK15-interactors, CBLs, did not have an  
369 apparent effect on AMT1;1 activity in *Xenopus* oocytes, nor was  $\text{NH}_4^+$  toxicity in *cbl* mutants affected.  
370 Taken together the data indicate that multiple CIPKs can affect AMT activity with different efficacy,  
371 possibly different tissue specificity, different specificity for AMT paralogs, and with differing dependence  
372 on CBLs.

373 Taking the results together, this work identified a key component in the  $\text{NH}_4^+$  feedback inhibition network,  
374 namely the protein kinase CIPK15, which directly interacts with AMTs to phosphorylate the conserved  
375 threonine in their C-terminus to adjust ammonium uptake and dependence on the external  $\text{NH}_4^+$   
376 concentration. The remaining open questions in the field are how the plant senses the ammonium  
377 concentration and how it activates CIPK15. CIPK15 has been reported involved in the ABA signaling  
378 pathway and phosphorylation of ERF7, an APETALA2/ EREBP-type transcription factor [54, 55], and more  
379 recently, CPK32 was shown to play a role in the regulation of AMT activity, it will be interesting to explore  
380 the ABA response and the interrelationship between CPK32 phosphorylation of residues downstream of  
381 T460 and the two CIPKs [56].

382 **ACKNOWLEDGEMENTS**

383 We would like to thank the Dr. Jörg Kudla (U. Münster, Germany) for providing plasmids containing *CIPK*  
384 ORFs for oocytes experiments. We thank Prof. Charles Brearley, School of Biological Sciences, and Dr.  
385 Sarah Wexler, Science Analytical Facility, (U. East Anglia, Norwich Research Park) for N<sup>15</sup> analyses. We  
386 thank Academia Sinica Advanced Optics Microscope Core Facility for technical support for fluorescence  
387 imaging. The core facility is funded by Academia Sinica Core Facility and Innovative Instrument Project  
388 (AS-CFII-108-116). We thank Anita K. Snyder and Miranda Loney for English editing. This research was  
389 supported by Academia Sinica, Taiwan, and Ministry of Science and Technology, Taiwan, Grants MOST  
390 105-2311-B-001-045 and 106-2311-B-001-037-MY3 (C.-H.H.) and Deutsche Forschungsgemeinschaft  
391 (DFG, German Research Foundation) under Germany's Excellence Strategy – EXC-2048/1 – project ID  
392 390686111, SFB 1208 – Project-ID 267205415, as well as the Alexander von Humboldt Professorship  
393 (WBF).

394 **AUTHOR CONTRIBUTIONS**

395 Conceptualization, C.-H.H. and W.B.F.; Methodology, C.-H.H., H.-Y.C., Y.-N.C., and H.-Y.W.;  
396 Investigation, C.-H.H., H.-Y.C., Y.-N.C., H.-Y.W., and Z.-T.L.; Writing, C.-H.H. and W.B.F.; Supervision,  
397 C.-H.H. The work was initiated by C.-H.H. in W.B.F.'s lab. The major parts were performed in C.-H.H.  
398 own lab.

399 **CONFLICT OF INTEREST**

400 The authors declare that they have no conflict of interest.

401   **REFERENCES**

- 402   1.     Gazzarrini S, Lejay L, Gojon A, Ninnemann O, Frommer WB, von Wiren N: **Three functional**  
403         **transporters for constitutive, diurnally regulated, and starvation-induced uptake of**  
404         **ammonium into *Arabidopsis* roots.** *Plant Cell* 1999, **11**(5):937-948.
- 405   2.     Marschner H: **Mineral Nutrition of Higher Plants.** London: Academic Press, Harcourt Brace &  
406         Co.; 1996.
- 407   3.     Glass ADM, Siddiqi MY: **Nitrogen Absorption by Plant Roots.** In: *Nitrogen Nutrition in Higher*  
408         *Plants.* Edited by Srivastava HS, Singh RP. New Delhi, India: Associated Publishing Co.; 1995:  
409         21-56.
- 410   4.     Gojon A, Soussana JF, Passama L, Robin P: **Nitrate reduction in roots and shoots of barley**  
411         **(*Hordeum vulgare* L.) and corn (*Zea mays* L.) seedlings: I. N Study.** *Plant Physiol* 1986,  
412         **82**(1):254-260.
- 413   5.     Fukao T, Xu K, Ronald PC, Bailey-Serres J: **A variable cluster of ethylene response factor-like**  
414         **genes regulates metabolic and developmental acclimation responses to submergence in rice.**  
415         *Plant Cell* 2006, **18**(8):2021-2034.
- 416   6.     Ludewig U, von Wiren N, Frommer WB: **Uniport of NH<sub>4</sub><sup>+</sup> by the root hair plasma membrane**  
417         **ammonium transporter LeAMT1;1.** *J Biol Chem* 2002, **277**(16):13548-13555.
- 418   7.     Marini AM, Vissers S, Urrestarazu A, Andre B: **Cloning and expression of the MEP1 gene**  
419         **encoding an ammonium transporter in *Saccharomyces cerevisiae*.** *EMBO J* 1994,  
420         **13**(15):3456-3463.
- 421   8.     Ninnemann O, Jauniaux JC, Frommer WB: **Identification of a high affinity NH<sub>4</sub><sup>+</sup> transporter**  
422         **from plants.** *EMBO J* 1994, **13**(15):3464-3471.
- 423   9.     Tremblay PL, Hallenbeck PC: **Of blood, brains and bacteria, the Amt/Rh transporter family:**  
424         **emerging role of Amt as a unique microbial sensor.** *Mol Microbiol* 2009, **71**(1):12-22.
- 425   10.    Dennison KL, Robertson WR, Lewis BD, Hirsch RE, Sussman MR, Spalding EP: **Functions of**  
426         **AKT1 and AKT2 potassium channels determined by studies of single and double mutants of**  
427         ***Arabidopsis*.** *Plant Physiol* 2001, **127**(3):1012-1019.

- 428 11. Duan F, Giehl RFH, Geldner N, Salt DE, von Wiren N: **Root zone-specific localization of AMTs**  
429 **determines ammonium transport pathways and nitrogen allocation to shoots.** *PLoS Biol*  
430 2018, **16**(10):e2006024.
- 431 12. Yuan L, Loqué D, Kojima S, Rauch S, Ishiyama K, Inoue E, Takahashi H, von Wirén N: **The**  
432 **organization of high-affinity ammonium uptake in *Arabidopsis* roots depends on the spatial**  
433 **arrangement and biochemical properties of AMT1-type transporters.** *Plant Cell* 2007,  
434 **19**(8):2636-2652.
- 435 13. Ludewig U, Wilken S, Wu B, Jost W, Obrdlik P, El Bakkoury M, Marini AM, André B,  
436 Hamacher T, Boles E *et al*: **Homo- and hetero-oligomerization of ammonium transporter-1**  
437 **NH<sub>4</sub><sup>+</sup> uniporters.** *J Biol Chem* 2003, **278**(46):45603-45610.
- 438 14. Brito AS, Neuhauser B, Wintjens R, Marini AM, Boeckstaens M: **Yeast filamentation signaling**  
439 **is connected to a specific substrate translocation mechanism of the Mep2 transceptor.** *PLoS*  
440 *Genet* 2020, **16**(2):e1008634.
- 441 15. Ast C, Foret J, Oltrogge LM, De Michele R, Kleist TJ, Ho CH, Frommer WB: **Ratiometric**  
442 **Matryoshka biosensors from a nested cassette of green- and orange-emitting fluorescent**  
443 **proteins.** *Nat Commun* 2017, **8**(1):431.
- 444 16. Britto DT, Kronzucker HJ: **NH<sub>4</sub><sup>+</sup> toxicity in higher plants: a critical review.** *J Plant Physiol*  
445 2002, **159**(6):567-584.
- 446 17. Svoboda N, Kerschbaum HH: **L-Glutamine-induced apoptosis in microglia is mediated by**  
447 **mitochondrial dysfunction.** *Eur J Neurosci* 2009, **30**(2):196-206.
- 448 18. Albrecht J, Norenberg MD: **Glutamine: A Trojan horse in ammonia neurotoxicity.** *Hepatology*  
449 2006, **44**(4):788-794.
- 450 19. Slayman CL, Slayman CW: **Net Uptake of Potassium in Neurospora Exchange for Sodium**  
451 **and Hydrogen Ions.** *J Gen Physiol* 1968, **52**(3):424-&.
- 452 20. Di Cera E: **A structural perspective on enzymes activated by monovalent cations.** *J Biol Chem*  
453 2006, **281**(3):1305-1308.
- 454 21. Hess DC, Lu WY, Rabinowitz JD, Botstein D: **Ammonium toxicity and potassium limitation in**  
455 **yeast.** *Plos Biol* 2006, **4**(11):2012-2023.

- 456 22. Wang MY, Siddiqi MY, Ruth TJ, Glass A: **Ammonium uptake by rice roots (II. kinetics of**  
457  **$^{13}\text{NH}_4^+$  influx across the plasmalemma).** *Plant Physiol* 1993, **103**(4):1259-1267.
- 458 23. Kronzucker HJ, Britto DT, Davenport RJ, Tester M: **Ammonium toxicity and the real cost of**  
459 **transport.** *Trends Plant Sci* 2001, **6**(8):335-337.
- 460 24. Loqué D, Lalonde S, Looger LL, von Wirén N, Frommer WB: **A cytosolic trans-activation**  
461 **domain essential for ammonium uptake.** *Nature* 2007, **446**(7132):195-198.
- 462 25. Lanquar V, Loque D, Hormann F, Yuan L, Bohner A, Engelsberger WR, Lalonde S, Schulze WX,  
463 von Wiren N, Frommer WB: **Feedback inhibition of ammonium uptake by a phospho-**  
464 **dependent allosteric mechanism in *Arabidopsis*.** *Plant Cell* 2009, **21**(11):3610-3622.
- 465 26. Qiu QS, Guo Y, Dietrich MA, Schumaker KS, Zhu JK: **Regulation of SOS1, a plasma**  
466 **membrane  $\text{Na}^+/\text{H}^+$  exchanger in *Arabidopsis thaliana*, by SOS2 and SOS3.** *Proc Natl Acad*  
467 *Sci USA* 2002, **99**(12):8436-8441.
- 468 27. Xu J, Li HD, Chen LQ, Wang Y, Liu LL, He L, Wu WH: **A protein kinase, interacting with two**  
469 **calcineurin B-like proteins, regulates  $\text{K}^+$  transporter AKT1 in *Arabidopsis*.** *Cell* 2006,  
470 **125**(7):1347-1360.
- 471 28. Tang RJ, Zhao FG, Garcia VJ, Kleist TJ, Yang L, Zhang HX, Luan S: **Tonoplast CBL-CIPK**  
472 **calcium signaling network regulates magnesium homeostasis in *Arabidopsis*.** *Proc Natl Acad*  
473 *Sci USA* 2015, **112**(10):3134-3139.
- 474 29. Ho CH, Lin SH, Hu HC, Tsay YF: **CHL1 functions as a nitrate sensor in plants.** *Cell* 2009,  
475 **138**(6):1184-1194.
- 476 30. Fuglsang AT, Guo Y, Cuin TA, Qiu QS, Song CP, Kristiansen KA, Bych K, Schulz A, Shabala S,  
477 Schumaker KS *et al*: ***Arabidopsis* protein kinase PKS5 inhibits the plasma membrane  $\text{H}^+$ -**  
478 **ATPase by preventing interaction with 14-3-3 protein.** *Plant Cell* 2007, **19**(5):1617-1634.
- 479 31. Maierhofer T, Diekmann M, Offenborn JN, Lind C, Bauer H, Hashimoto K, Al-Rasheid KAS,  
480 Luan S, Kudla J, Geiger D *et al*: **Site- and kinase-specific phosphorylation-mediated activation**  
481 **of SLAC1, a guard cell anion channel stimulated by abscisic acid.** *Sci Signal* 2014, **7**(342).

- 482 32. Cheong YH, Pandey GK, Grant JJ, Batistic O, Li L, Kim BG, Lee SC, Kudla J, Luan S: **Two**  
483 **calcineurin B-like calcium sensors, interacting with protein kinase CIPK23, regulate leaf**  
484 **transpiration and root potassium uptake in *Arabidopsis*. *Plant J* 2007, **52**(2):223-239.**
- 485 33. Zhou L, Lan W, Chen B, Fang W, Luan S: **A calcium sensor-regulated protein kinase,**  
486 **CALCINEURIN B-LIKE PROTEIN-INTERACTING PROTEIN KINASE19, is required**  
487 **for pollen tube growth and polarity. *Plant Physiol* 2015, **167**(4):1351-1360.**
- 488 34. Tang RJ, Zhao FG, Yang Y, Wang C, Li K, Kleist TJ, Lemaux PG, Luan S: **A calcium signalling**  
489 **network activates vacuolar K<sup>+</sup> remobilization to enable plant adaptation to low-K**  
490 **environments. *Nat Plants* 2020.**
- 491 35. Leleu O, Vuylsteker C: **Unusual regulatory nitrate reductase activity in cotyledons of**  
492 ***Brassica napus* seedlings: enhancement of nitrate reductase activity by ammonium supply. *J***  
493 ***Exp Bot* 2004, **55**(398):815-823.**
- 494 36. Jones AM, Xuan Y, Xu M, Wang RS, Ho CH, Lalonde S, You CH, Sardi MI, Parsa SA, Smith-  
495 Valle E *et al*: **Border control--a membrane-linked interactome of *Arabidopsis*. *Science* 2014,**  
496 **344(6185):711-716.**
- 497 37. Schiestl RH, Gietz RD: **High efficiency transformation of intact yeast cells using single**  
498 **stranded nucleic acids as a carrier. *Curr Genet* 1989, **16**(5):339-346.**
- 499 38. Ramer SW, Elledge SJ, Davis RW: **Detection of altered protein conformations in living cells.**  
500 ***Proc Natl Acad Sci USA* 1992, **89**:11589-11593.**
- 501 39. Kim JG, Li X, Roden JA, Taylor KW, Aakre CD, Su B, Lalonde S, Kirik A, Chen Y, Baranage G  
502 *et al*: **Xanthomonas T3S effector XopN suppresses PAMP-triggered immunity and interacts**  
503 **with a tomato atypical receptor-like kinase and TFT1. *Plant Cell* 2009, **21**(4):1305-1323.**
- 504 40. Loqué D, Mora SI, Andrade SL, Pantoja O, Frommer WB: **Pore mutations in ammonium**  
505 **transporter AMT1 with increased electrogenic ammonium transport activity. *J Biol Chem***  
506 **2009, **284**(37):24988-24995.**
- 507 41. Pehl U, Leisgen C, Gampe K, Guenther E: **Automated higher-throughput compound screening**  
508 **on ion channel targets based on the *Xenopus laevis* oocyte expression system. *Assay Drug Dev***  
509 ***Technol* 2004, **2**(5):515-524.**

- 510 42. Leisgen C, Kuester M, Methfessel C: **The roboocyte: automated electrophysiology based on**  
511 *Xenopus oocytes*. *Methods Mol Biol* 2007, **403**:87-109.
- 512 43. Lemaire K, Van de Velde S, Van Dijck P, Thevelein JM: **Glucose and sucrose act as agonist**  
513 **and mannose as antagonist ligands of the G protein-coupled receptor Gpr1 in the yeast**  
514 *Saccharomyces cerevisiae*. *Mol Cell* 2004, **16**(2):293-299.
- 515 44. Kolukisaoglu U, Weini S, Blazevic D, Batistic O, Kudla J: **Calcium sensors and their**  
516 **interacting protein kinases: genomics of the Arabidopsis and rice CBL-CIPK signaling**  
517 **networks**. *Plant Physiol* 2004, **134**(1):43-58.
- 518 45. Wu X, Liu T, Zhang Y, Duan F, Neuhauser B, Ludewig U, Schulze WX, Yuan L: **Ammonium**  
519 **and nitrate regulate NH<sub>4</sub><sup>+</sup> uptake activity of Arabidopsis ammonium transporter AtAMT1;3**  
520 **via phosphorylation at multiple C-terminal sites**. *J Exp Bot* 2019, **70**(18):4919-4930.
- 521 46. Lima JE, Kojima S, Takahashi H, von Wieren N: **Ammonium triggers lateral root branching in**  
522 *Arabidopsis* in an AMMONIUM TRANSPORTER1;3-dependent manner. *Plant Cell* 2010,  
523 **22**(11):3621-3633.
- 524 47. Rogato A, D'Apuzzo E, Barbulova A, Omrane S, Parlati A, Carfagna S, Costa A, Lo Schiavo F,  
525 Esposito S, Chiurazzi M: **Characterization of a developmental root response caused by**  
526 **external ammonium supply in Lotus japonicus**. *Plant Physiol* 2010, **154**(2):784-795.
- 527 48. Elmlinger MW, Mohr H: **Glutamine synthetase in Scots pine seedlings and its control by blue**  
528 **light and light absorbed by phytochrome**. *Planta* 1992, **188**(3):396-402.
- 529 49. Wang MY, Siddiqi MY, Ruth TJ, Glass ADM: **Ammonium Uptake by Rice Roots .II. Kinetics**  
530 **of <sup>13</sup>NH<sub>4</sub><sup>+</sup>- Influx across the Plasmalemma**. *Plant Physiol* 1993, **103**(4):1259-1267.
- 531 50. Marini AM, Springael JY, Frommer WB, Andre B: **Cross-talk between ammonium**  
532 **transporters in yeast and interference by the soybean SAT1 protein**. *Mol Microbiol* 2000,  
533 **35**(2):378-385.
- 534 51. Lalonde S, Sero A, Pratelli R, Pilot G, Chen J, Sardi MI, Parsa SA, Kim D-Y, Acharya BR, Stein  
535 EV *et al*: **A membrane protein/signaling protein interaction network for Arabidopsis version**  
536 **AMPv2**. *Front Physiol* 2010, **1**:24.

- 537 52. Ludwig U, Neuhauser B, Dynowski M: **Molecular mechanisms of ammonium transport and**  
538 **accumulation in plants.** *FEBS Lett* 2007, **581**(12):2301-2308.
- 539 53. Straub T, Ludwig U, Neuhauser B: **The kinase CIPK23 inhibits ammonium transport in**  
540 ***Arabidopsis thaliana*.** *Plant Cell* 2017, **29**(2):409-422.
- 541 54. Guo Y, Xiong L, Song CP, Gong D, Halfter U, Zhu JK: **A calcium sensor and its interacting**  
542 **protein kinase are global regulators of abscisic acid signaling in *Arabidopsis*.** *Dev Cell* 2002,  
543 **3**(2):233-244.
- 544 55. Song CP, Agarwal M, Ohta M, Guo Y, Halfter U, Wang PC, Zhu JK: **Role of an *Arabidopsis***  
545 **AP2/EREBP-type transcriptional repressor in abscisic acid and drought stress responses.**  
546 *Plant Cell* 2005, **17**(8):2384-2396.
- 547 56. Qin DB, Liu MY, Yuan L, Zhu Y, Li XD, Chen LM, Wang Y, Chen YF, Wu WH, Wang Y:  
548 **CPK32-mediated phosphorylation is essential for the ammonium transport activity of**  
549 **AMT1;1 in *Arabidopsis* roots.** *J Exp Bot* 2020.  
550



551 **Figure legends**

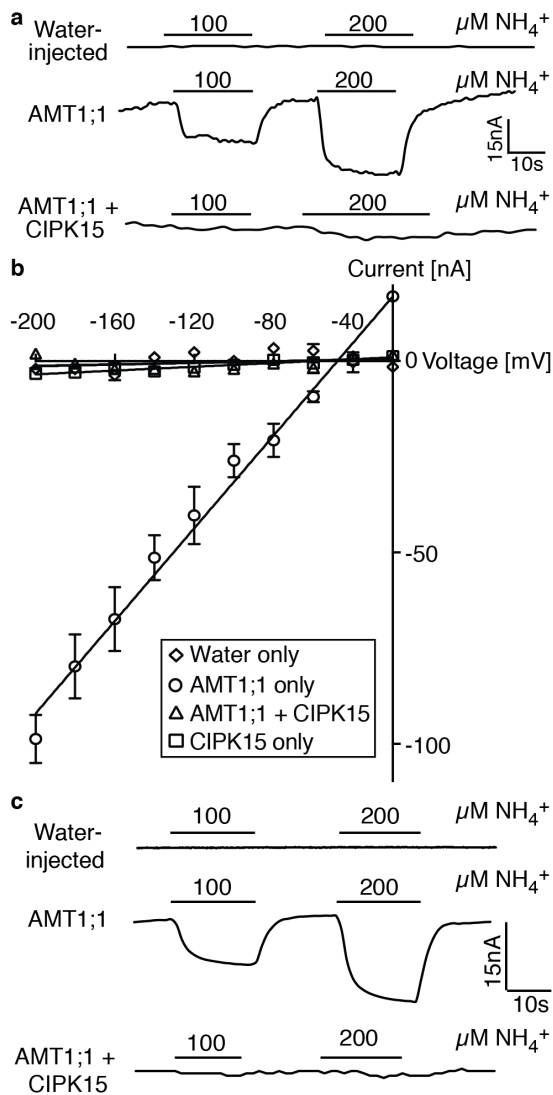

552

553 **Fig. 1 CIPK15 inhibits AMT1 activity in *Xenopus* oocytes. (a-b)** Co-expression of CIPK15 inhibited  
554  $\text{NH}_4^+$ -triggered inward currents of AMT1;1 in *Xenopus* oocytes. Oocytes were injected with water only, 50  
555 ng cRNA of AMT1;1 only, 50 ng AMT1;1 + 50 ng CIPK15, or 50 ng CIPK15 only, and perfused with  
556  $\text{NH}_4\text{Cl}$  at the indicated concentrations (a) or (b) 0.2 mM for current recordings (a) and IV curve (b). Oocytes  
557 were voltage clamped at (a)  $-120$  mV or (b)  $-40$  mV and stepped in  $-20$ -mV increments between  $-20$  and  
558  $-200$  mV for 300 ms. (b) Currents (nA) were background subtracted (difference between currents at  $+300$   
559 ms in the cRNA-injected AMT1;1 only/AMT1;1 + CIPK15/CIPK15 only and water-injected control of the  
560 indicated substrates). The data are the mean  $\pm$  SE for three experiments. (c) TVEC traces of oocytes injected  
561 with water only, 5 ng cRNA of AMT1;1 only, or 5 ng AMT1;1 + 0.5 ng CIPK15, and perfused with  $\text{NH}_4\text{Cl}$   
562 at the indicated concentrations. Similar results were obtained in at least three independent experiments using  
563 different batches of oocytes.

**a**  $\text{NH}_4^+$  transporter activity biosensor

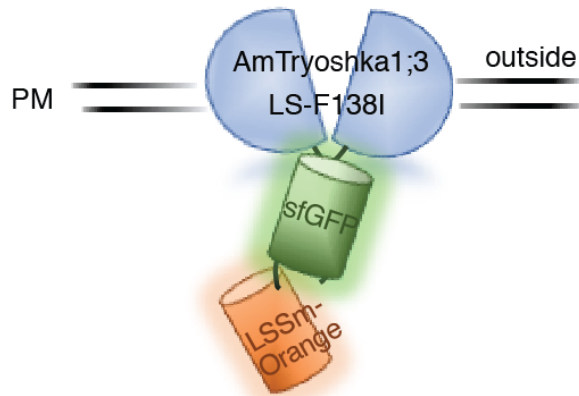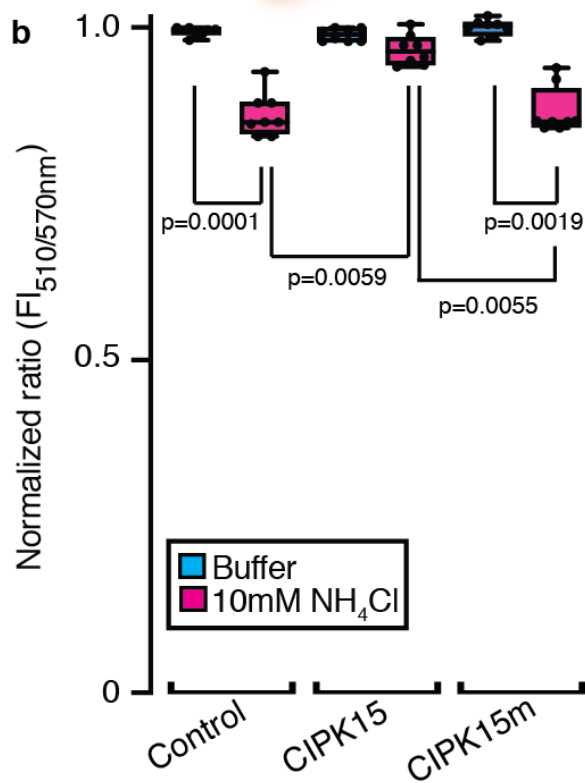

564

565 **Fig. 2 CIPK15 inhibited AmTryoshka1;3 LS-F138I activity in yeast.** (a) Schematic representation of

566 AmTryoshka1;3 LS-F138I [15]. (b) CIPK15 reduced  $\text{NH}_4^+$ -triggered AmTryoshka1;3 LS-F138I [15]

567 responses in yeast. Amtryoshka1;3 LS-F138I was co-expressed with control (vector only), CIPK15 and

568 CIPK15m (inactive mutant). Results of normalized fluorescence ratio (normalized to buffer control=1,

569  $\lambda_{\text{exc}} 440 \text{ nm}$ , ratio=  $\text{FI}_{510\text{nm}/570\text{nm}}$ ) after addition of  $\text{NH}_4\text{Cl}$  as represented by box and whiskers (mean  $\pm$  SE,

570  $n=8$ ). Center lines show the medians; box limits indicate the 25th and 75th percentiles as determined by

571 Prism software; whiskers extend 1.5 times the interquartile range from the 25th and 75th percentiles, outliers

572 are represented by dots. p, significant change as shown in the figure (Two-Way ANOVA followed by

573 Tukey's post-test). PM = plasma membrane.

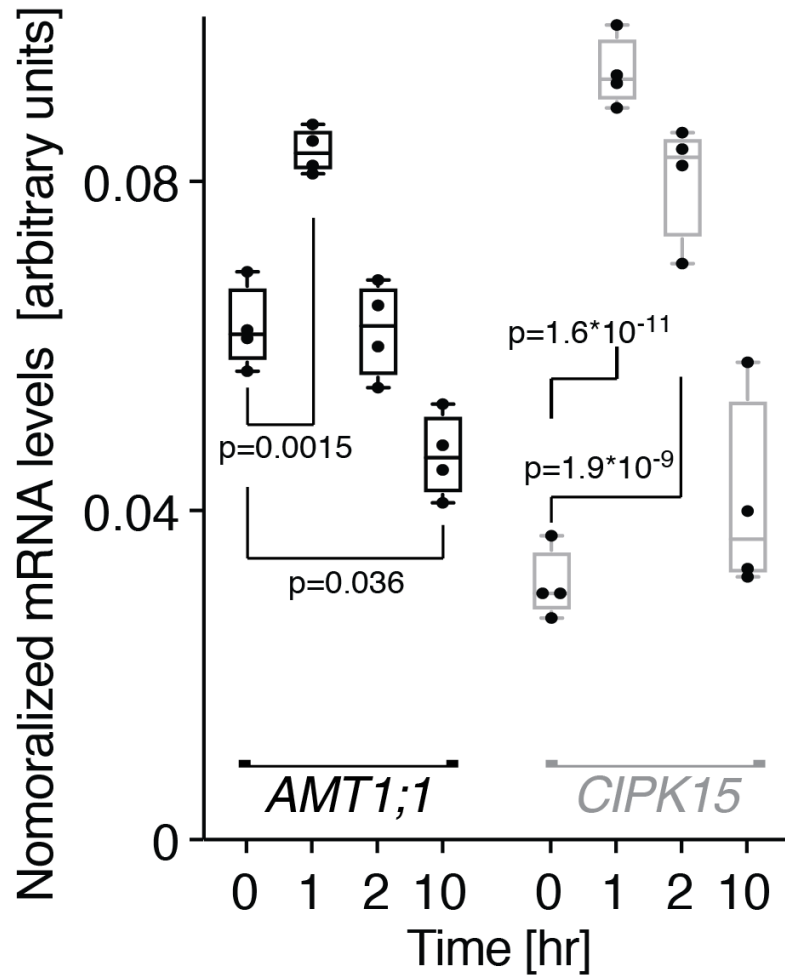

574

575 **Fig. 3 NH<sub>4</sub><sup>+</sup>-triggered *CIPK15* mRNA accumulation.** qRT-PCR analyses of *AMT1;1* and *CIPK15* mRNA  
576 levels in roots after over 10 h after addition of 1 mM NH<sub>4</sub><sup>+</sup>. Levels were normalized to *UBQ10* [mean ± SE  
577 for four independent experiments (each experiment n >50, total n >200)]. p, significant change for mRNA  
578 levels of *AMT1;1* and *CIPK15* at 1, 2, and 10 h compared to at 0 h (Two-Way ANOVA followed by Tukey's  
579 post-test).

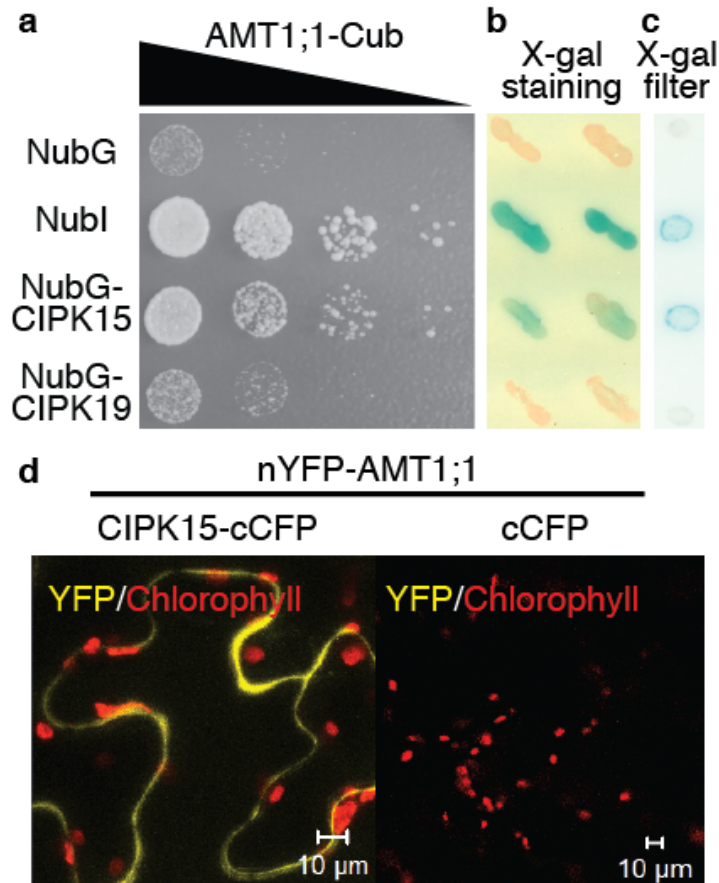

580

581 **Fig. 4 CIPK15 can interact with AMT1;1.** Interaction growth assay (a),  $\beta$ -galactosidase staining (b) and  
582 filter (c) assay in yeast; and split-fluorescent protein interaction assay (d) in tobacco leaves for AMT1.1 and  
583 CIPK15 protein interactions. (a) Plasmids expressing AMT1;1 and CIPKs were expressed in yeast.  
584 Interaction indicated by growth on SD-Trp -Leu -His. Growth on SD-LT as control (Fig. S5). Comparable  
585 results were obtained in three independent experiments. (b-c) Interaction of CIPKs and AMT1;1 in a split-  
586 ubiquitin system detected by X-Gal staining and filter assays using full-length AMT1;1-Cub-PLV as bait  
587 and NubG, NubI, and NubG-full-length CIPKs as prey. NubI/NubG served as positive (blue color) and  
588 negative controls, respectively. (d) Split-fluorescent protein interaction assay for AMT1;1 and CIPK15.  
589 YFP/chlorophyll, merged image of fluorescence and chloroplast. Reconstitution of YFP fluorescence from  
590 nYFP-AMT1;1 + CIPK15-cCFP and nYFP-AMT1;1 + cCFP (negative control). Comparable results with  
591 different combinations shown in Fig. S7.

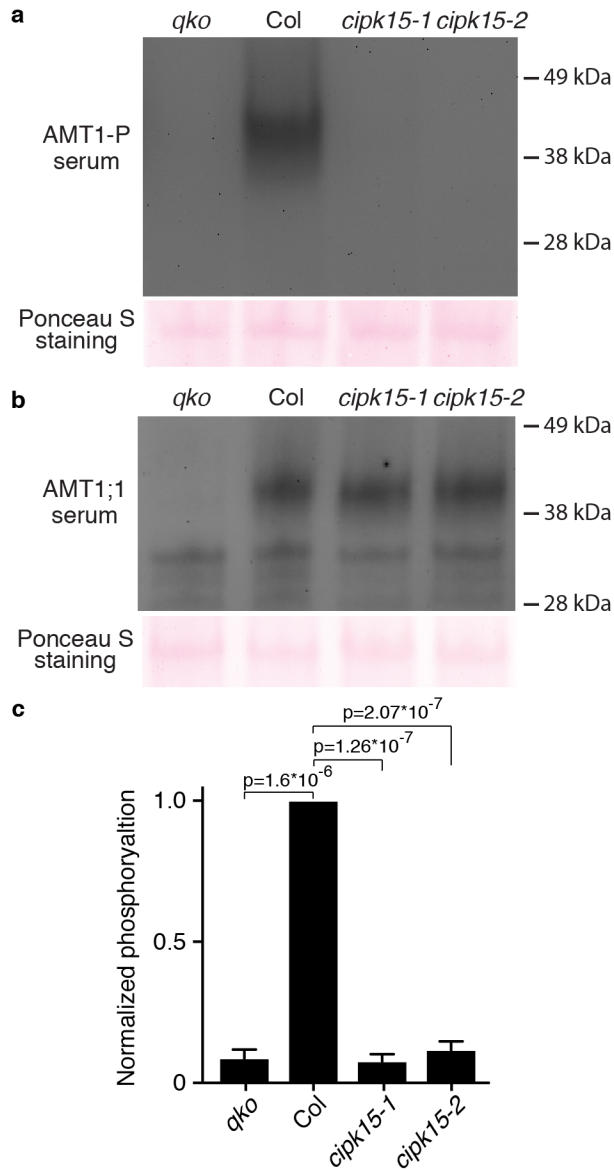

592

593 **Fig. 5 AMT1;1-T460 phosphorylation is reduced in *cipk15* mutant plants.** Plant seedlings were  
594 germinated and grown for 7 days in half-strength MS medium with 5 mM KNO<sub>3</sub> as the sole nitrogen source,  
595 then starved for 2 days in half-strength MS medium without nitrogen. Seedlings were treated with 1 mM  
596 NH<sub>4</sub>Cl for 1 h, membrane fractions were isolated and probed with anti-AMT1-P antibodies (a) and anti-  
597 AMT1;1 antibodies (b) [25]. Ponceau S staining served as a loading control. Quantification of  
598 phosphorylation of AMT1-P levels normalized to Ponceau S staining and relative to wild-type shown in (c).  
599 Corresponding data and replications were obtained in three independent experiments. Data (c) are the mean  
600 ± SD for three experiments. p, significant change compared to wild-type as shown in figure (Two-way  
601 ANOVA followed by Tukey's post-test).

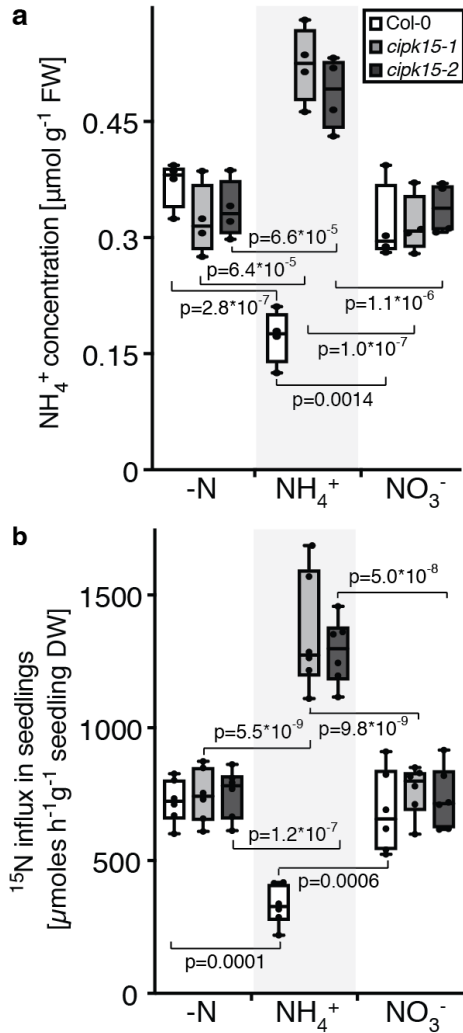

602

603 **Fig. 6  $\text{NH}_4^+$  content and transport in *cipk15* mutants.** Plant seedlings were germinated and grown for 7  
 604 days in half-strength MS medium with 5 mM  $\text{KNO}_3$  as the sole nitrogen source, then all seedlings were  
 605 starved for 2 days in half-strength MS medium without nitrogen. For  $\text{NH}_4^+$  content analyses (a) seedlings  
 606 were collected after being starved for 2 days (-N), or after with 1 mM  $\text{NH}_4\text{Cl}$  ( $\text{NH}_4^+$ ), and 1mM  $\text{KNO}_3$  ( $\text{NO}_3^-$ )  
 607 for 1 h. For  $^{15}\text{N}$  labeled uptake, (b) seedlings were collected after being starved for 2 days (-N) (1 mM  
 608  $^{15}\text{NH}_4\text{Cl}$  was used for 15 mins for  $^{15}\text{N}$ -labeling), or after treatment with 1mM  $\text{NH}_4\text{Cl}$  ( $\text{NH}_4^+$ ), and 1mM  
 609  $\text{KNO}_3$  ( $\text{NO}_3^-$ ) for 1 h (1 mM  $^{15}\text{NH}_4\text{Cl}$  was used for last 15 mins for  $\text{N}^{15}$ -labeling for conditions of  $\text{NH}_4^+$  and  
 610  $\text{NO}_3^-$ ). Each data point represents different experiments, in which seedlings  $n > 15$ , total  $n > 60$ ) in Col-0  
 611 and two *cipk15* knockout mutants and presented as box and whiskers. Center lines show the medians; box  
 612 limits indicate the 25th and 75th percentiles as determined by Prism software; whiskers extend 1.5 times the  
 613 interquartile range from the 25th and 75th percentiles, outliers are represented by dots. p, significant change  
 614 compared to before submergence (Two-way ANOVA followed by Tukey's post-test).

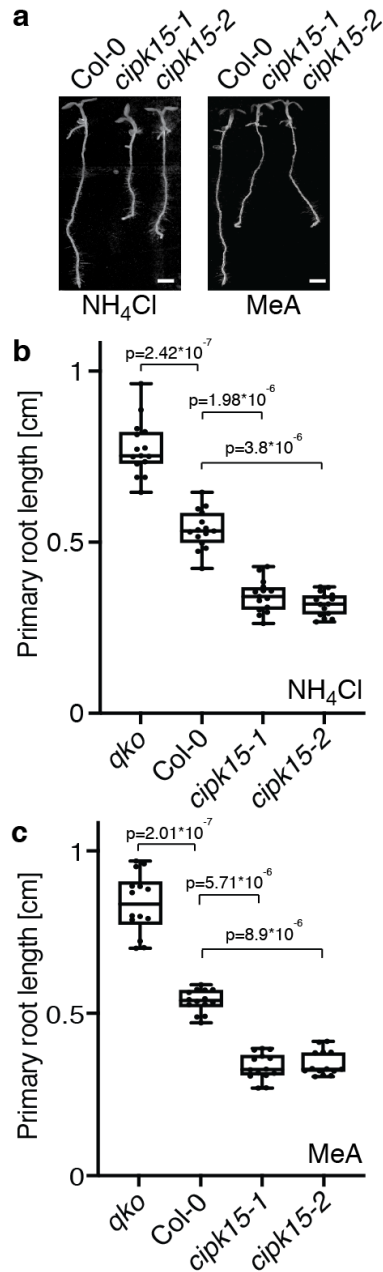

615

616

617

618

619

620

621

622

623

**Fig. 7 Hypersensitivity of *cipk15* mutant plants to NH<sub>4</sub><sup>+</sup> and MeA.** Representative images (a) and quantification results of primary root length of plants grown on plates containing 20 mM NH<sub>4</sub>Cl (b) or 20mM MeA (c). Primary root length in wild-type (Col-0), *qko* mutant, and *cipk15* mutants on 20 mM NH<sub>4</sub>Cl (b) or on 20 mM MeA (c) are presented as box and whiskers. Center lines show the medians; box limits indicate the 25th and 75th percentiles as determined by Prism software; whiskers extend 1.5 times the interquartile range from the 25th and 75th percentiles, outliers are represented by dots (means ± SE; n ≥ 15). p, significant change of *qko* mutant and *cipk15* mutants compared to wild-type plants (Two-way ANOVA followed by Tukey's post-test). Scale bar: 0.1 cm.
